# Supplementary material
Source: publisher figshare collection journal article supplement (https://plos.figshare.com/articles/dataset/_/3575409)

Benthic herbivorous grazers

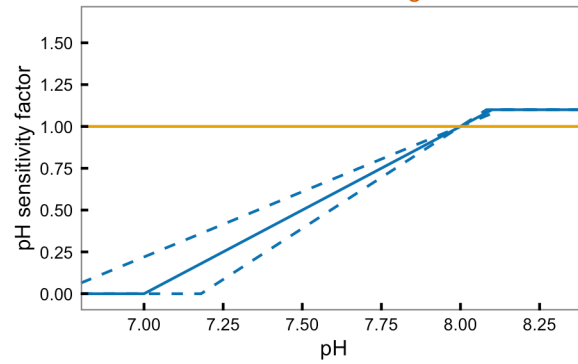

Mesozooplankton

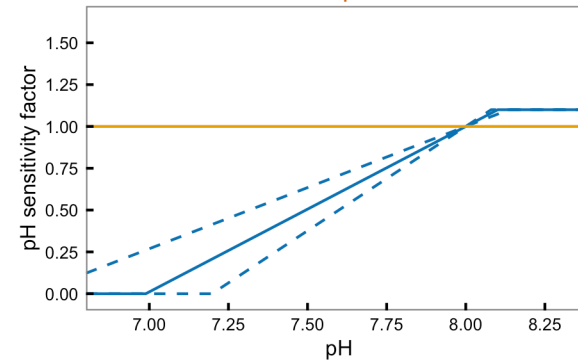

Bivalves

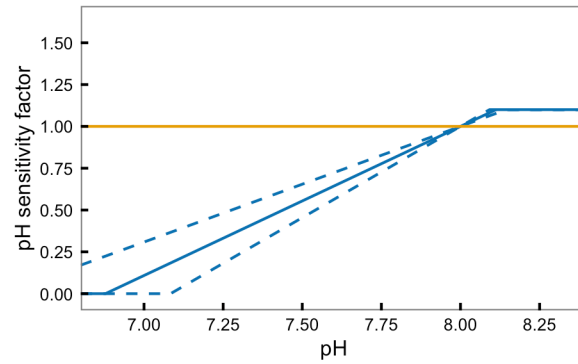

Pteropods

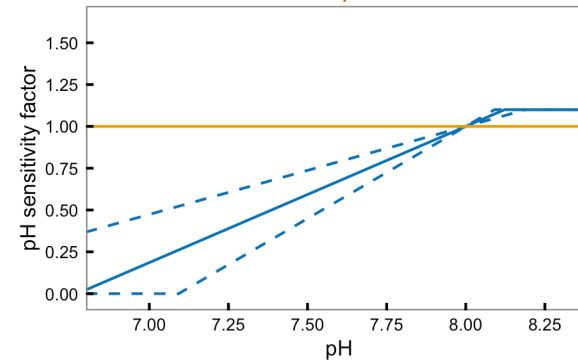

Coralline algae

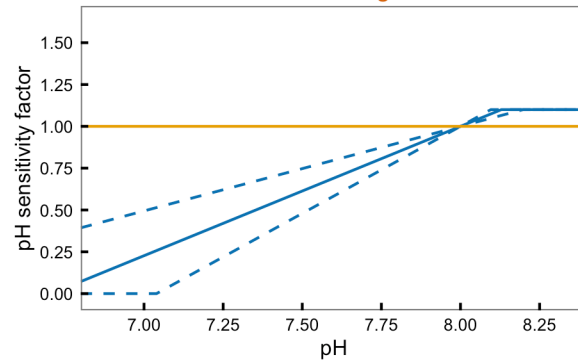

Crabs

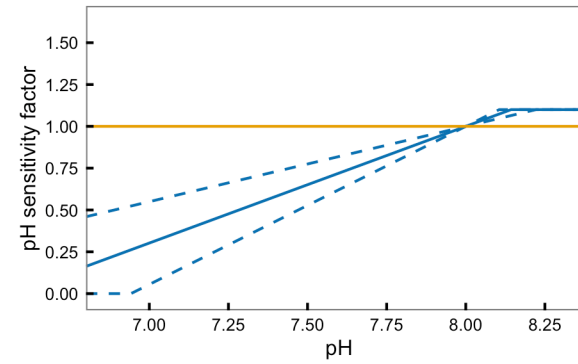

Shallow benthic filter feeders

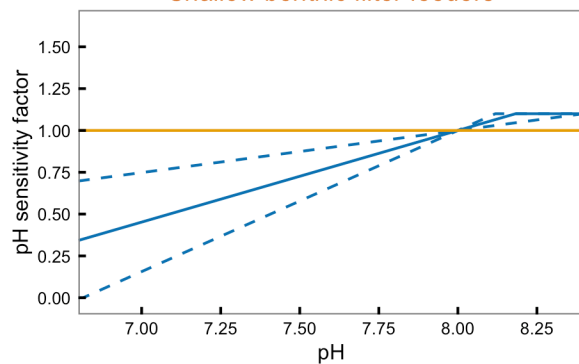

Crangon shrimp

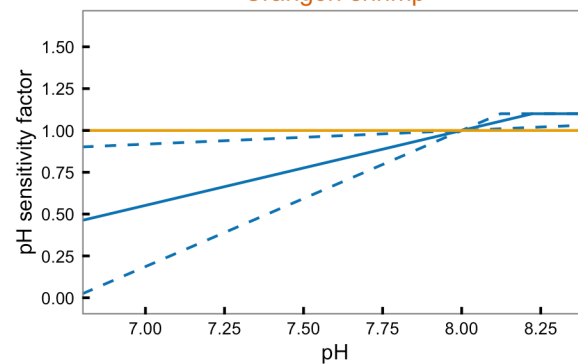

Dungeness crab

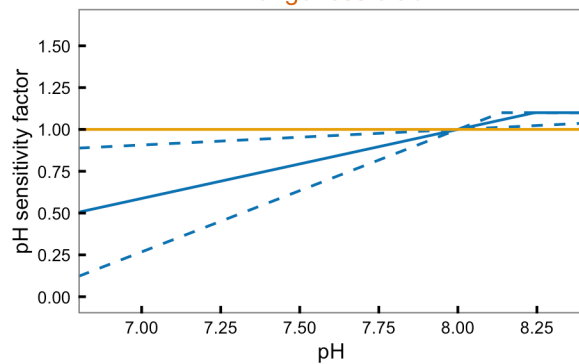

Carnivorous infauna

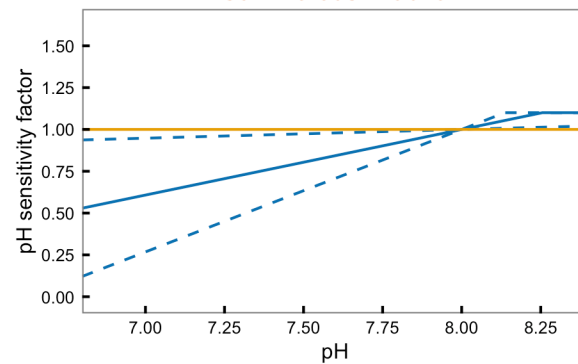

Deposit feeders

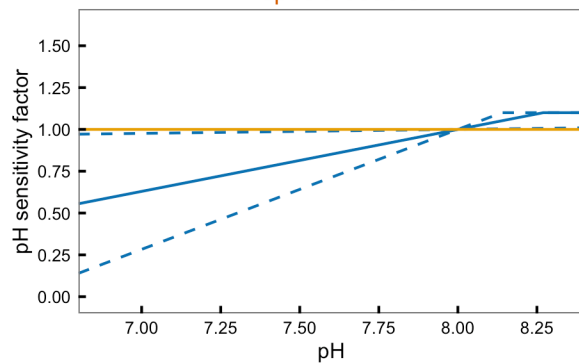

Humboldt squid

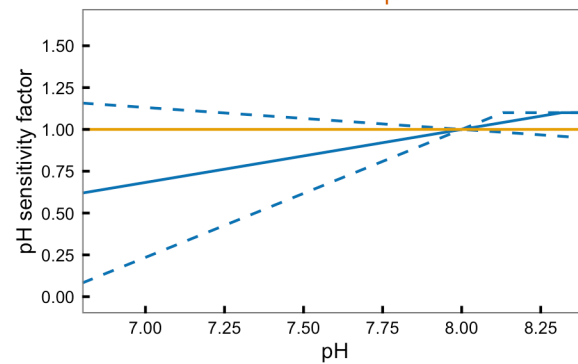

Small demersal sharks

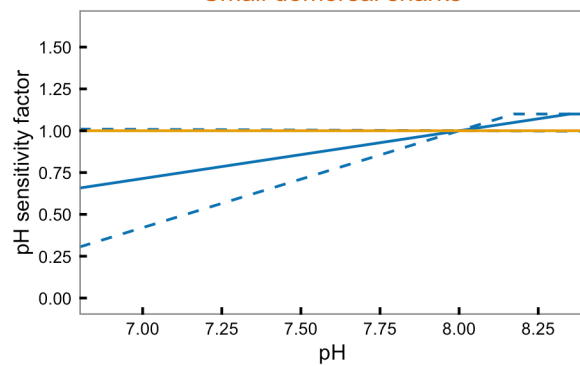

Large zooplankton

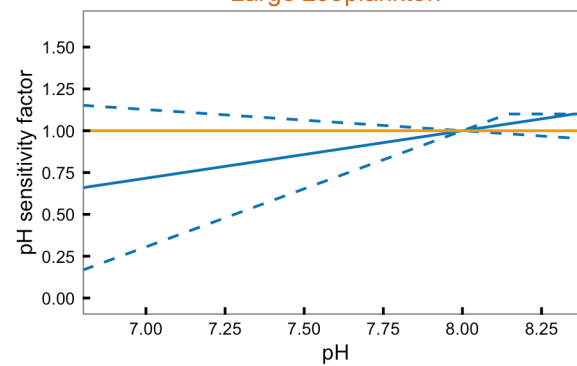

Fish

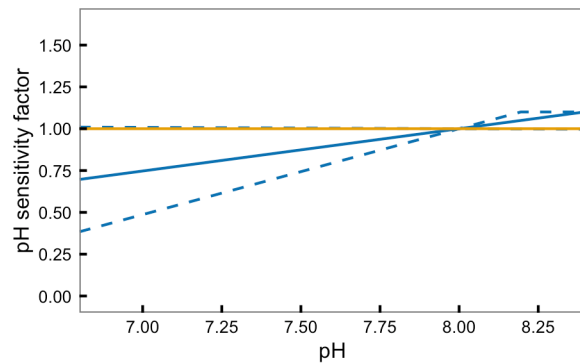

Stony corals

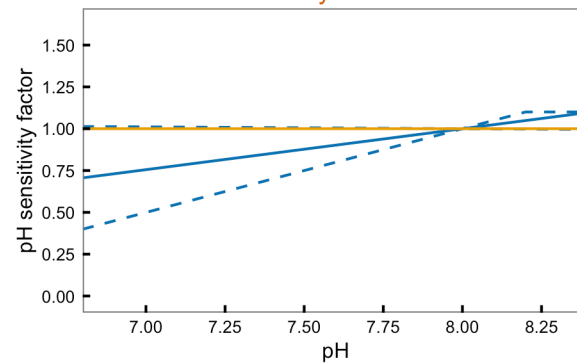

Soft corals

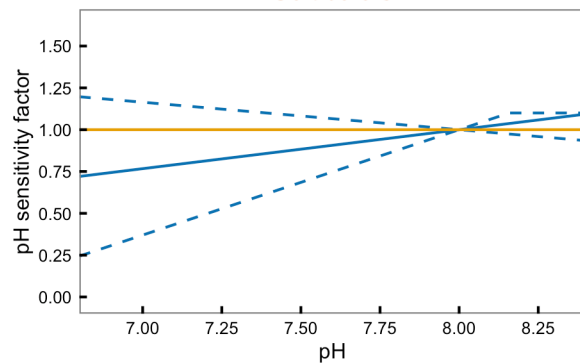

Market squid

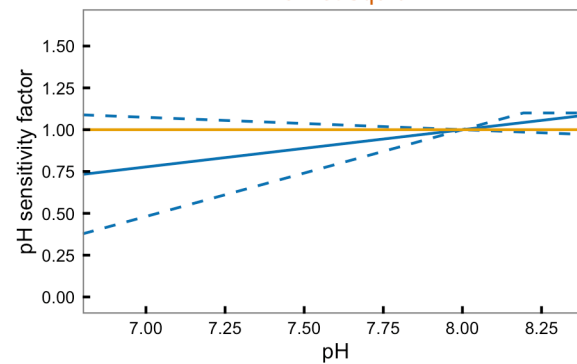

Pelagic bacteria

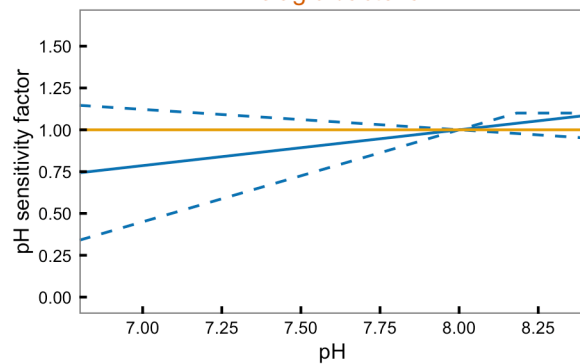

Sea stars moonsnail whelk

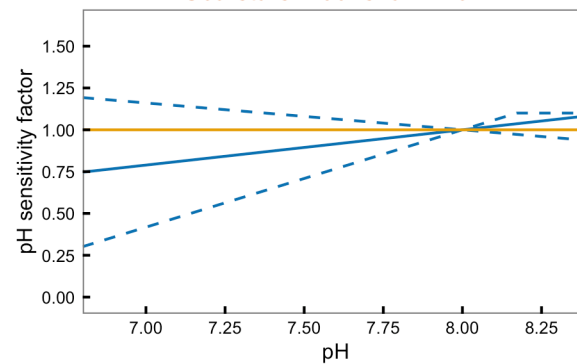

Nearshore sea urchins

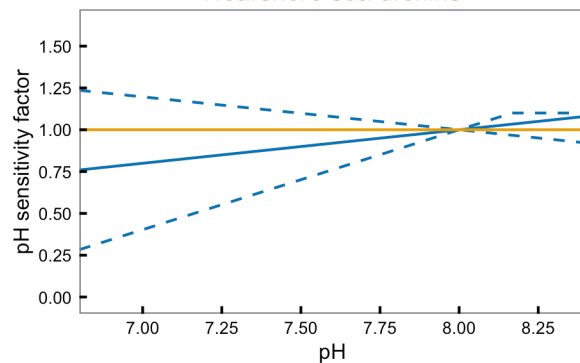

Pandalid shrimp

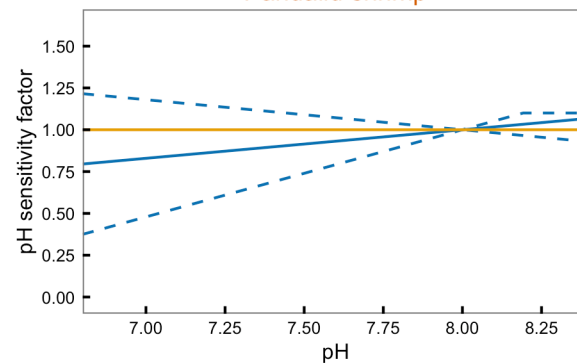

Spiny dogfish

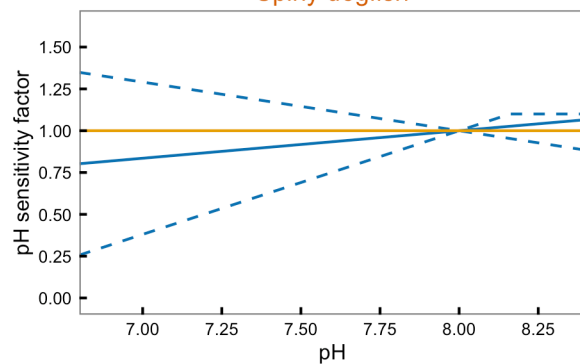

Coccolithophore

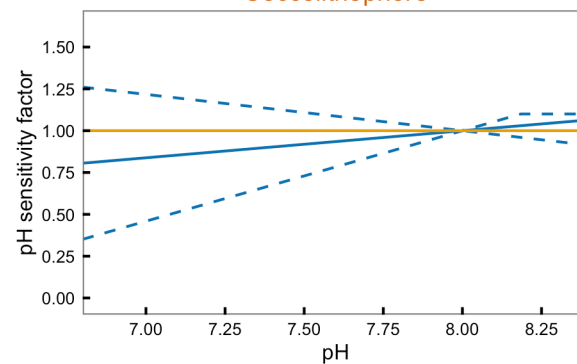

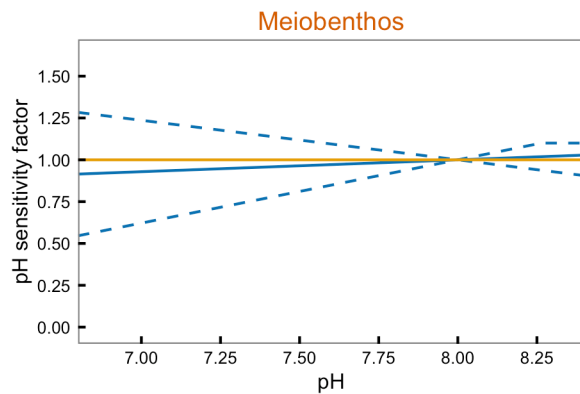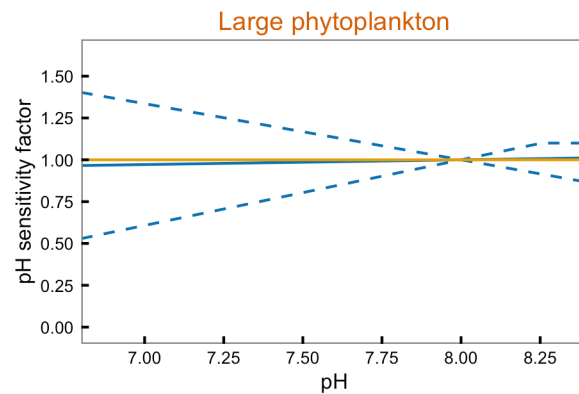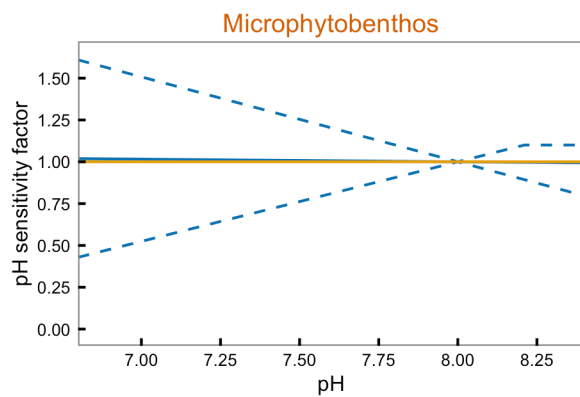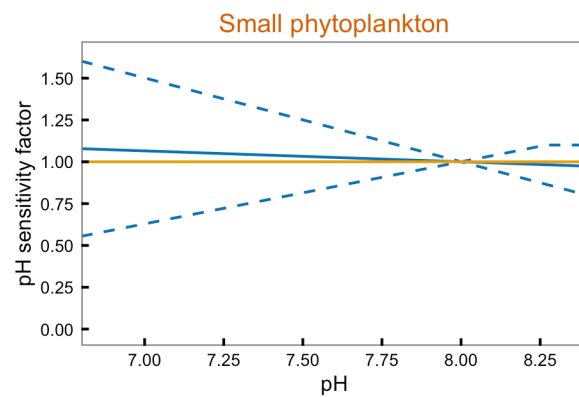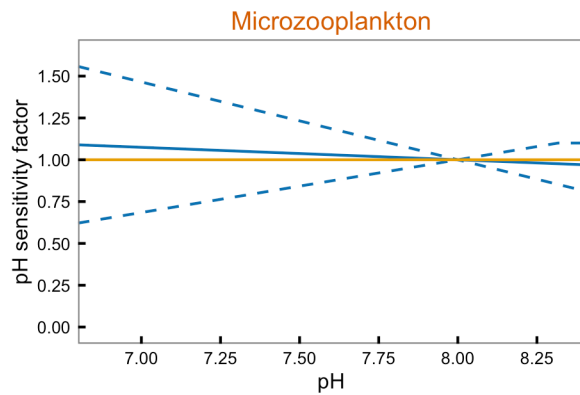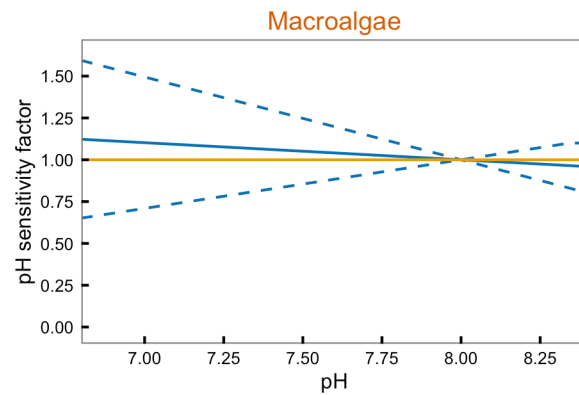

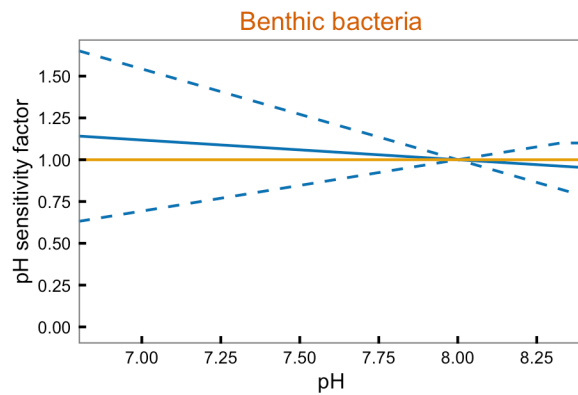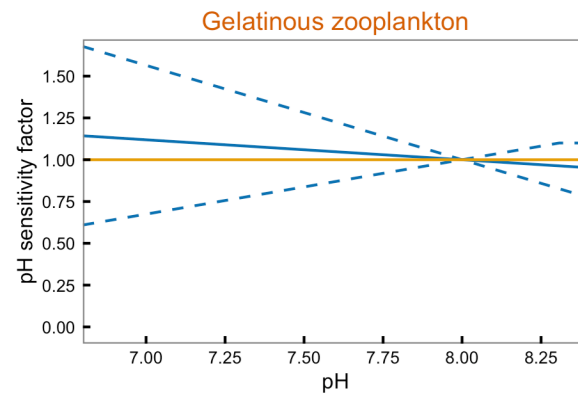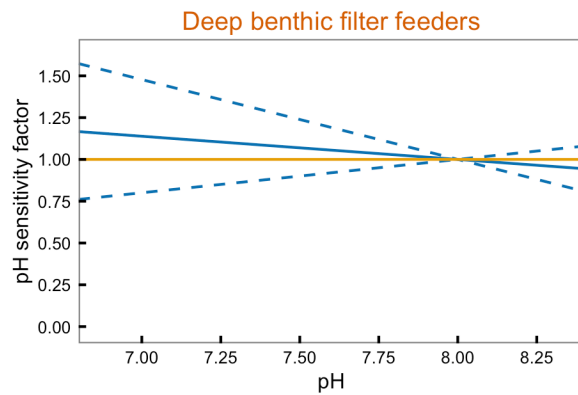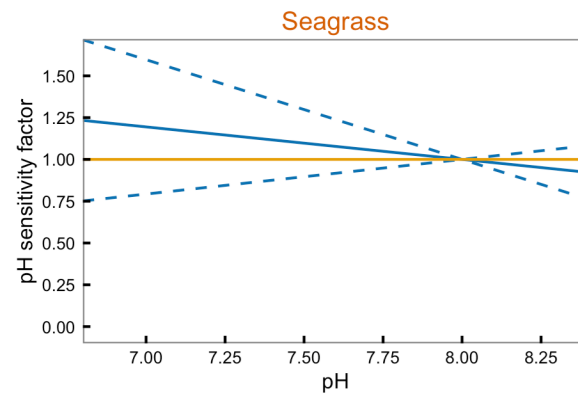

Supplement: Supplementary file [file 1]
